# Supplementary material for: Intestinal enteroids recapitulate the effects of short-chain fatty acids on the intestinal epithelium
Source: PubMed Central journal article supplement (PMC7117711; doi:10.1371/journal.pone.0230231), 2020-04-02
Supplement: pone.0230231.s003.pdf [file pone.0230231.s003.pdf]

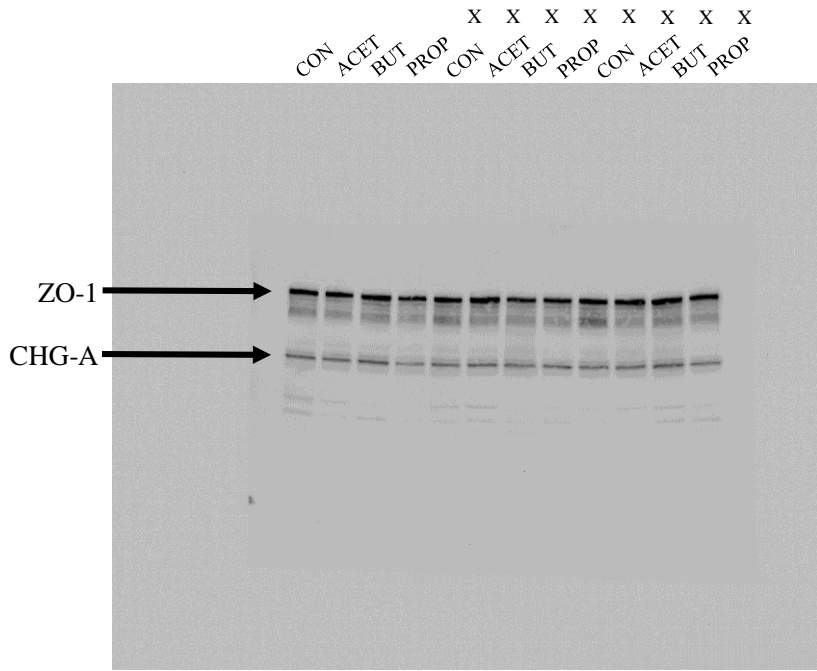

X – not used in final figure

**Figure 7D**

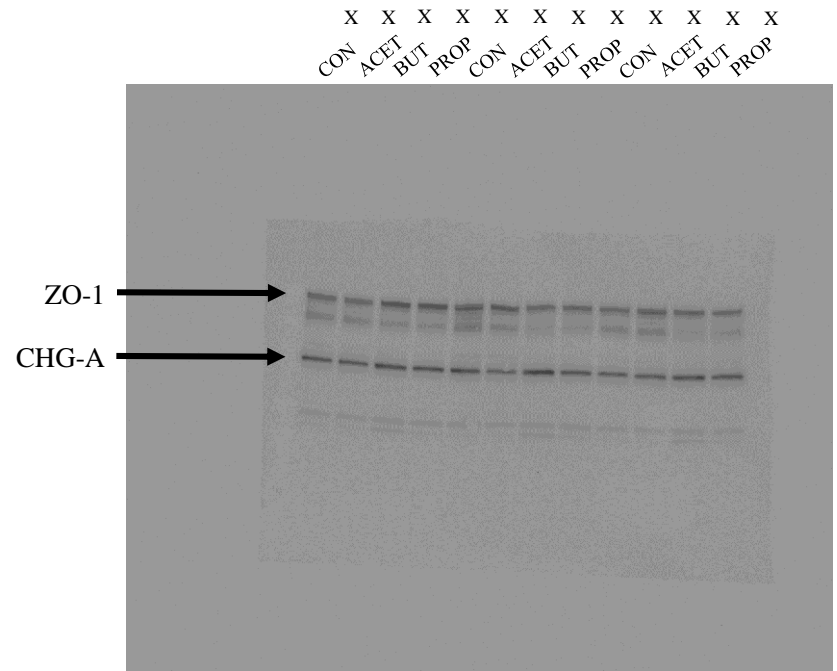

X – not used in final figure

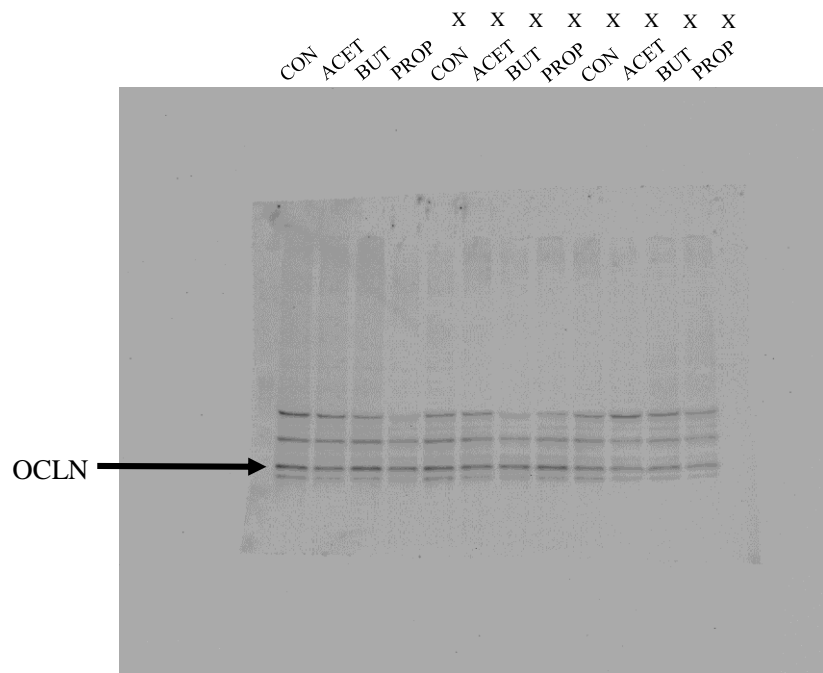

X – not used in final figure

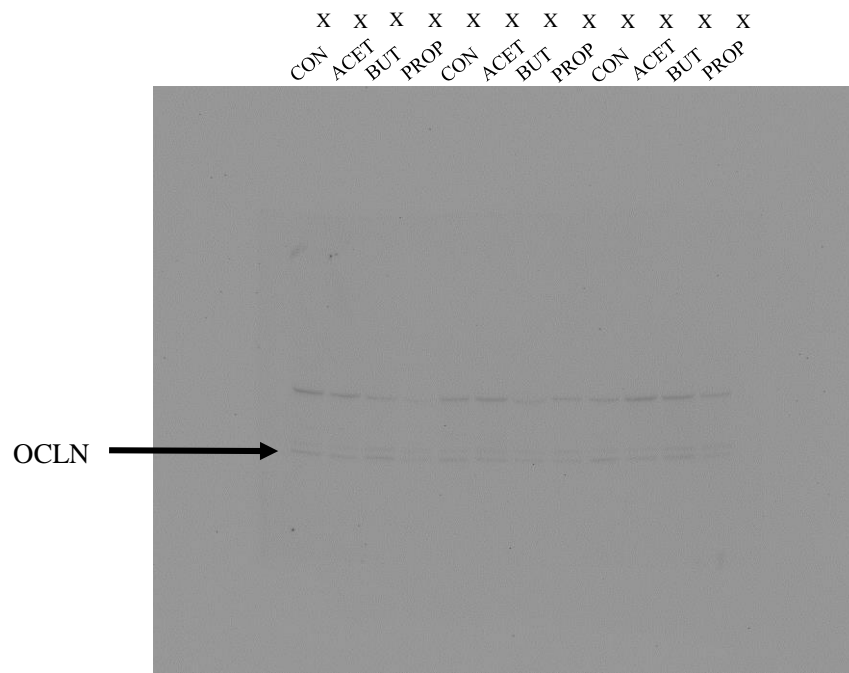

X – not used in final figure

**Figure 7D**

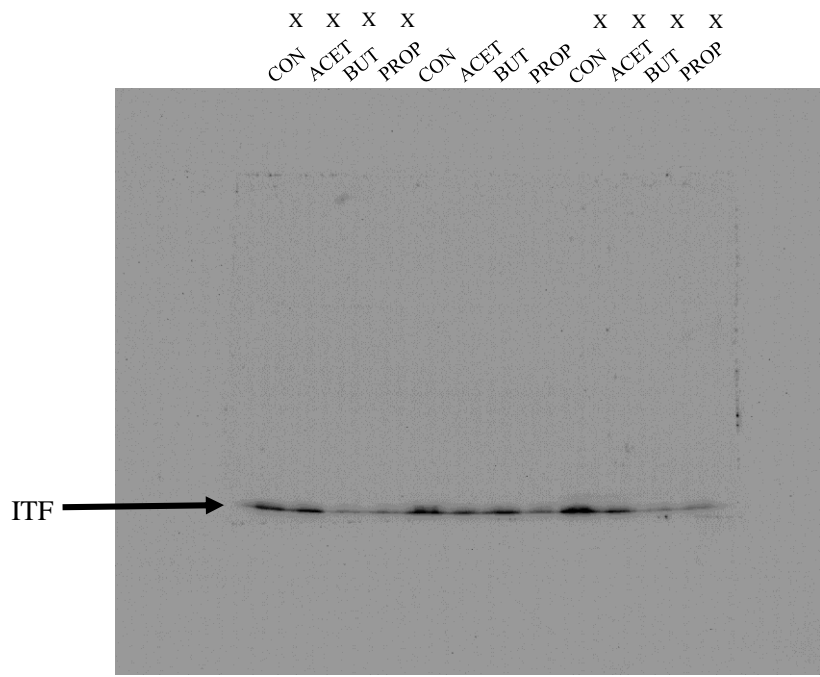

X – not used in final figure

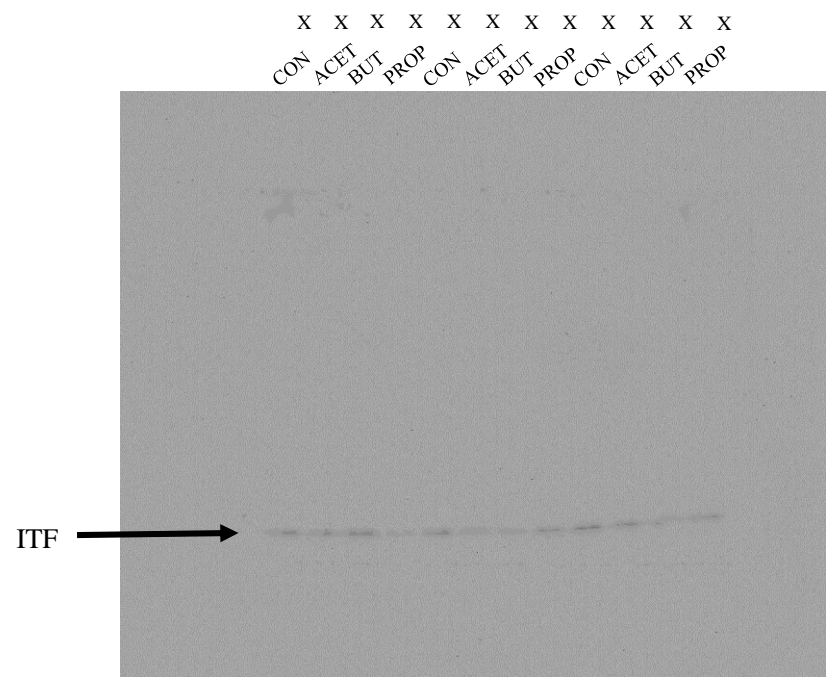

X – not used in final figure

Figure 7D

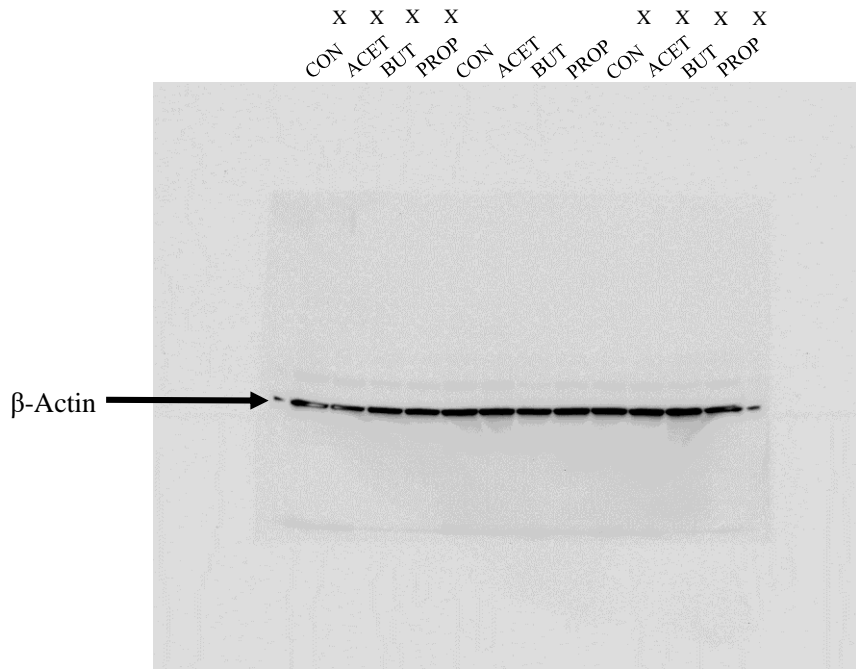

X – not used in final figure

**Figure 7D**

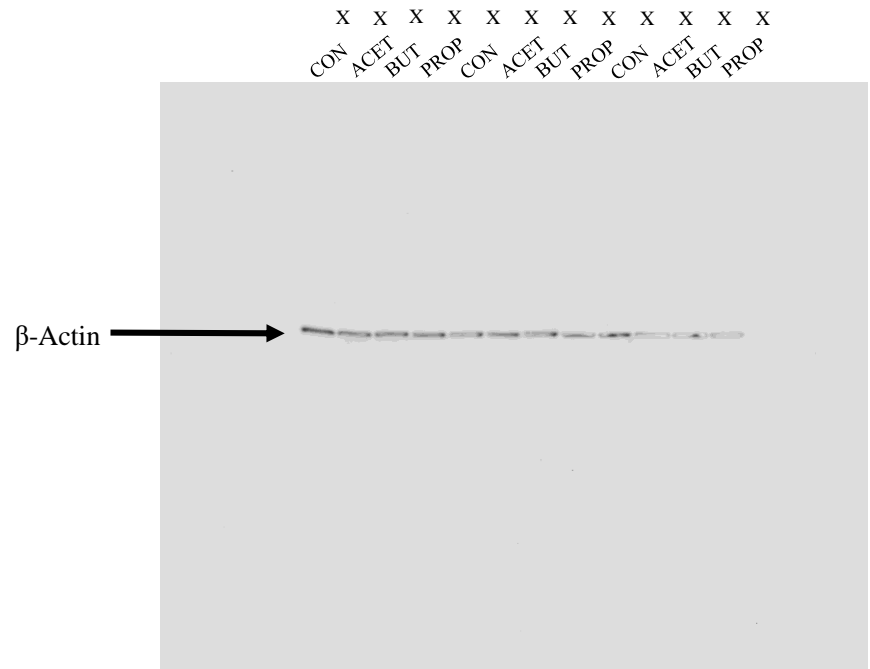

X – not used in final figure
